# Supplementary material for: All cause and cause specific mortality in obsessive-compulsive disorder: nationwide matched cohort and sibling cohort study
Source: BMJ. 2024 Jan 17;384:e077564. doi: 10.1136/bmj-2023-077564 (PMC10792686; doi:10.1136/bmj-2023-077564)
Supplement: Supplementary file 1 — Web appendix: Supplementary tables [file ferl077564.ww1.pdf]

## SUPPLEMENTARY MATERIAL

**Supplementary Table A.** Swedish International Classification of Diseases (ICD) codes used to group specific causes of death in the study

| <b>Specific cause of death</b>                                                                             | <b>Corresponding Swedish ICD-8 diagnostic codes (deaths from 1973 to 1986)</b> | <b>Corresponding Swedish ICD-9 diagnostic codes (deaths from 1987 to 1996)</b> | <b>Corresponding Swedish ICD-10 diagnostic codes (deaths from 1997 to 2020)</b> |
|------------------------------------------------------------------------------------------------------------|--------------------------------------------------------------------------------|--------------------------------------------------------------------------------|---------------------------------------------------------------------------------|
| <b>Certain infectious and parasitic diseases</b>                                                           | 000-136                                                                        | 001-139                                                                        | A00–B99                                                                         |
| <b>Neoplasms</b>                                                                                           | 140-239                                                                        | 140-239                                                                        | C00–D48                                                                         |
| <b>Diseases of the blood and blood-forming organs and certain disorders involving the immune mechanism</b> | 275, 280-289                                                                   | 279, 280-289                                                                   | D50–D89                                                                         |
| <b>Endocrine, nutritional, and metabolic diseases</b>                                                      | 240-279, minus 275                                                             | 240-279, minus 279                                                             | E00–E90                                                                         |
| <b>Mental and behavioral disorders</b>                                                                     | 290-315                                                                        | 290-319                                                                        | F00–F99                                                                         |
| <b>Diseases of the nervous system</b>                                                                      | 320-324, 330-333, 340-349, 350-358                                             | 320-326, 330-337, 340-349, 350-359                                             | G00–G99                                                                         |
| <b>Diseases of the eye and adnexa<sup>a</sup></b>                                                          | 360-369, 370-379                                                               | 360-379                                                                        | H00–H59                                                                         |
| <b>Diseases of the ear and mastoid process<sup>a</sup></b>                                                 | 380-389                                                                        | 380-389                                                                        | H60–H95                                                                         |
| <b>Diseases of the circulatory system</b>                                                                  | 390-458                                                                        | 390-459                                                                        | I00–I99                                                                         |
| <b>Diseases of the respiratory system</b>                                                                  | 460-519                                                                        | 460-519                                                                        | J00–J99                                                                         |
| <b>Diseases of the digestive system</b>                                                                    | 520-577                                                                        | 520-579                                                                        | K00–K93                                                                         |
| <b>Diseases of the skin and subcutaneous tissue<sup>a</sup></b>                                            | 680-709                                                                        | 680-709                                                                        | L00–L99                                                                         |
| <b>Diseases of the musculoskeletal system and connective tissue</b>                                        | 710-738                                                                        | 710-739                                                                        | M00–M99                                                                         |
| <b>Diseases of the genitourinary system</b>                                                                | 580-629                                                                        | 580-629                                                                        | N00–N99                                                                         |
| <b>Pregnancy, childbirth, and the</b>                                                                      | 630-678                                                                        | 630-679                                                                        | O00–O99                                                                         |

|                                                                                                |                                          |                                          |                                     |
|------------------------------------------------------------------------------------------------|------------------------------------------|------------------------------------------|-------------------------------------|
| <b>puerperium<sup>a</sup></b>                                                                  |                                          |                                          |                                     |
| <b>Certain conditions originating in the perinatal period</b>                                  | 760-779                                  | 760-779                                  | P00–P96                             |
| <b>Congenital malformations, deformations and chromosomal abnormalities</b>                    | 740-759                                  | 740-759                                  | Q00–Q99                             |
| <b>Symptoms, signs and abnormal clinical and laboratory findings, not elsewhere classified</b> | 780-796                                  | 780-799                                  | R00–R99                             |
| <b>Codes for special purposes</b>                                                              | –                                        | –                                        | U00-U99                             |
| <b>External causes of morbidity and mortality</b>                                              | E807-E999                                | E800-E999                                | V01–Y98                             |
|                                                                                                | <b>Accidents:</b><br>E807-E949           | <b>Accidents:</b><br>E800-E929           | <b>Accidents:</b><br>V01-X59        |
|                                                                                                | <b>Suicides:</b><br>E950-E959, E980-E989 | <b>Suicides:</b><br>E950-E959, E980-E989 | <b>Suicides:</b><br>X60-X84, Y10-34 |

<sup>a</sup>Grouped together under ‘Other causes of death’ given the small number of deaths due to this cause in the study.

**Supplementary Table B.** Swedish International Classification of Diseases (ICD) codes used to identify lifetime diagnoses of psychiatric disorder comorbidities in the study

| Psychiatric disorders                                                                                                                                                               | Corresponding Swedish ICD-8 diagnostic codes | Corresponding Swedish ICD-9 diagnostic codes | Corresponding Swedish ICD-10 diagnostic codes        |
|-------------------------------------------------------------------------------------------------------------------------------------------------------------------------------------|----------------------------------------------|----------------------------------------------|------------------------------------------------------|
| <b>Neurodevelopmental disorders:</b> Autism spectrum disorders, attention-deficit/hyperactivity disorder <sup>a</sup> , and Tourette syndrome and chronic tic disorder <sup>b</sup> | 306.2                                        | 299, 307C, 314                               | F84, F90, F95                                        |
| <b>Psychotic disorders:</b> Schizophrenia and other psychotic disorders                                                                                                             | 295 (minus 295.5), 297, 298 (minus 298.09)   | 295 (minus 295F), 297, 298 (minus 298A)      | F20, F21, F22, F23, F24, F25 (minus F25.0), F28, F29 |
| <b>Bipolar disorders</b>                                                                                                                                                            | 296 (minus 296.00 and 296.20)                | 296 (minus 296B)                             | F25.0, F30, F31, F34.0                               |
| <b>Depressive disorders:</b> Major depressive disorder, persistent mood disorder, and unspecified mood disorder                                                                     | 296.0, 296.2, 298.09                         | 296B, 298A, 300E, 311                        | F32, F33, F34 (minus F34.0), F38, F39                |
| <b>Anxiety disorders:</b> Phobic, anxiety, reaction to severe stress, and adjustment disorders                                                                                      | 300.0, 300.2, 307, 308.4                     | 300A, 300C, 308, 309                         | F40.0, F40.1, F40.2, F41.0, F41.1, F43               |
| <b>Eating disorders</b>                                                                                                                                                             | —                                            | 307B, 307F                                   | F50.0-F50.3, F50.9                                   |
| <b>Substance use disorder</b>                                                                                                                                                       | 303, 304                                     | 303, 304, 305A, 305X                         | F10-F16, F18-19                                      |

<sup>a</sup>Individuals with attention-deficit/hyperactivity disorder (ADHD) were also identified by prescription of ADHD drugs, collected from the Prescription Drug Register, specifically Amphetamine (Anatomical Therapeutic Chemical [ATC] Classification System code: N06BA01), Dexamphetamine (N06BA02), Methylphenidate (N06BA04), Atomoxetine (N06BA09), and Lisdexamphetamine (N06BA12). <sup>b</sup>Tourette syndrome and chronic tic disorder were identified following the algorithm described in Rück et al.<sup>24</sup>

**Supplementary Table C.** Hazard ratios (HRs) with 95% confidence intervals (CIs) for all cause and cause specific mortality among women with obsessive-compulsive disorder (OCD), compared with matched unaffected women

|                                                                                         | <b>Women with<br/>OCD<br/>(N=35,493)</b> | <b>Matched<br/>unexposed<br/>women<br/>(N=354,930)</b> | <b>HR (95% CI)<br/>Model 1<sup>a</sup></b> | <b>HR (95% CI)<br/>Model 2<sup>b</sup></b> |
|-----------------------------------------------------------------------------------------|------------------------------------------|--------------------------------------------------------|--------------------------------------------|--------------------------------------------|
| <b>Causes of death</b>                                                                  | <b>n (%)</b>                             | <b>n (%)</b>                                           |                                            |                                            |
| <b>All-cause mortality</b>                                                              | 2,544 (7.17)                             | 17,341 (4.89)                                          | 1.88 (1.80 to 1.97)                        | 1.79 (1.71 to 1.88)                        |
| <b>Natural causes of death</b>                                                          | 2,073 (5.84)                             | 16,469 (4.64)                                          | 1.48 (1.41 to 1.55)                        | 1.31 (1.24 to 1.37)                        |
| Certain infectious and parasitic diseases                                               | 34 (0.10)                                | 268 (0.08)                                             | 1.27 (0.89 to 1.82)                        | 1.24 (0.87 to 1.79)                        |
| Neoplasms                                                                               | 462 (1.30)                               | 4,835 (1.36)                                           | 0.94 (0.85 to 1.03)                        | 0.90 (0.82 to 1.00)                        |
| Endocrine, nutritional and metabolic diseases                                           | 74 (0.21)                                | 407 (0.11)                                             | 1.83 (1.43 to 2.35)                        | 1.51 (1.17 to 1.96)                        |
| Mental and behavioural disorders                                                        | 158 (0.45)                               | 1,031 (0.29)                                           | 1.56 (1.32 to 1.84)                        | 1.54 (1.30 to 1.83)                        |
| Diseases of the nervous system                                                          | 77 (0.22)                                | 714 (0.20)                                             | 1.09 (0.86 to 1.38)                        | 1.01 (0.80 to 1.29)                        |
| Diseases of the circulatory system                                                      | 809 (2.28)                               | 6,496 (1.83)                                           | 1.31 (1.22 to 1.41)                        | 1.26 (1.17 to 1.36)                        |
| Diseases of the respiratory system                                                      | 233 (0.66)                               | 1,114 (0.31)                                           | 2.12 (1.84 to 2.44)                        | 1.94 (1.68 to 2.25)                        |
| Diseases of the digestive system                                                        | 75 (0.21)                                | 571 (0.16)                                             | 1.30 (1.03 to 1.66)                        | 1.12 (0.88 to 1.44)                        |
| Diseases of the genitourinary system                                                    | 36 (0.10)                                | 209 (0.06)                                             | 1.72 (1.21 to 2.45)                        | 1.61 (1.12 to 2.31)                        |
| Symptoms, signs and abnormal clinical and laboratory findings, not elsewhere classified | 67 (0.19)                                | 456 (0.13)                                             | 1.48 (1.15 to 1.92)                        | 1.37 (1.05 to 1.78)                        |
| Other natural causes of death <sup>c</sup>                                              | 48 (0.14)                                | 368 (0.10)                                             | 1.29 (0.95 to 1.74)                        | 1.14 (0.84 to 1.56)                        |
| <b>Unnatural causes of death</b>                                                        |                                          |                                                        |                                            |                                            |
| External causes of morbidity and mortality                                              | 471 (1.33)                               | 865 (0.24)                                             | 5.46 (4.88 to 6.11)                        | 4.01 (3.55 to 4.53)                        |
| Accidents                                                                               | 121 (0.34)                               | 476 (0.13)                                             | 2.50 (2.05 to 3.06)                        | 2.10 (1.71 to 2.58)                        |
| Suicides                                                                                | 342 (0.96)                               | 345 (0.10)                                             | 9.82 (8.45 to 11.4)                        | 6.39 (5.39 to 7.58)                        |

<sup>a</sup>Adjusted for all matching variables (i.e., sex, birth year, county of residence at the time of OCD diagnosis). <sup>b</sup>Adjusted for all variables in Model 1 and additionally for migrant status (Swedish born v born abroad) and latest recorded highest level of education, family income level, and civil status. <sup>c</sup>Includes all groups with a small number of deaths ( $\leq 10$ ) in the OCD cohort for at least one of the sexes and the causes of death classified in the ICD as 'codes for special purposes'.

**Supplementary Table D.** Hazard ratios (HRs) with 95% confidence intervals (CIs) for all cause and cause specific mortality among men with obsessive-compulsive disorder (OCD), compared with matched unexposed men

|                                                                                         | Men with OCD<br>(N=25,885) | Matched<br>unexposed men<br>(N=258,550) | HR (95% CI)<br>Model 1 <sup>a</sup> | HR (95% CI)<br>Model 2 <sup>b</sup> |
|-----------------------------------------------------------------------------------------|----------------------------|-----------------------------------------|-------------------------------------|-------------------------------------|
| <b>Causes of death</b>                                                                  | <b>n (%)</b>               | <b>n (%)</b>                            |                                     |                                     |
| <b>All-cause mortality</b>                                                              | 2,243 (8.67)               | 13,278 (5.13)                           | 2.15 (2.05 to 2.26)                 | 1.83 (1.74 to 1.93)                 |
| <b>Natural causes of death</b>                                                          | 1,634 (6.31)               | 11,833 (4.57)                           | 1.59 (1.51 to 1.68)                 | 1.31 (1.23 to 1.38)                 |
| Certain infectious and parasitic diseases                                               | 33 (0.13)                  | 220 (0.08)                              | 1.47 (1.02 to 2.13)                 | 1.15 (0.79 to 1.69)                 |
| Neoplasms                                                                               | 319 (1.23)                 | 3,711 (1.43)                            | 0.84 (0.75 to 0.95)                 | 0.82 (0.73 to 0.92)                 |
| Endocrine, nutritional and metabolic diseases                                           | 69 (0.27)                  | 352 (0.14)                              | 1.93 (1.49 to 2.49)                 | 1.53 (1.16 to 2.00)                 |
| Mental and behavioural disorders                                                        | 94 (0.36)                  | 444 (0.17)                              | 2.09 (1.68 to 2.62)                 | 1.77 (1.41 to 2.24)                 |
| Diseases of the nervous system                                                          | 72 (0.28)                  | 421 (0.16)                              | 1.68 (1.31 to 2.16)                 | 1.52 (1.17 to 1.97)                 |
| Diseases of the circulatory system                                                      | 730 (2.82)                 | 4,709 (1.82)                            | 1.65 (1.52 to 1.79)                 | 1.46 (1.34 to 1.58)                 |
| Diseases of the respiratory system                                                      | 129 (0.50)                 | 821 (0.32)                              | 1.57 (1.30 to 1.89)                 | 1.36 (1.13 to 1.65)                 |
| Diseases of the digestive system                                                        | 80 (0.31)                  | 486 (0.19)                              | 1.63 (1.28 to 2.06)                 | 1.27 (0.99 to 1.62)                 |
| Diseases of the genitourinary system                                                    | 23 (0.09)                  | 143 (0.06)                              | 1.58 (1.02 to 2.45)                 | 1.41 (0.90 to 2.23)                 |
| Symptoms, signs and abnormal clinical and laboratory findings, not elsewhere classified | 57 (0.22)                  | 307 (0.12)                              | 1.88 (1.41 to 2.49)                 | 1.35 (1.00 to 1.83)                 |
| Other natural causes of death <sup>c</sup>                                              | 28 (0.11)                  | 219 (0.08)                              | 1.26 (0.85 to 1.87)                 | 0.91 (0.60 to 1.38)                 |
| <b>Unnatural causes of death</b>                                                        |                            |                                         |                                     |                                     |
| External causes of morbidity and mortality                                              | 608 (2.35)                 | 1438 (0.56)                             | 4.34 (3.94 to 4.78)                 | 2.87 (2.58 to 3.20)                 |
| Accidents                                                                               | 198 (0.76)                 | 708 (0.27)                              | 2.77 (2.36 to 3.24)                 | 1.81 (1.52 to 2.15)                 |
| Suicides                                                                                | 399 (1.54)                 | 662 (0.26)                              | 6.17 (5.44 to 6.99)                 | 4.09 (3.55 to 4.72)                 |

<sup>a</sup>Adjusted for all matching variables (i.e., sex, birth year, county of residence at the time of OCD diagnosis). <sup>b</sup>Adjusted for all variables in Model 1 and additionally for migrant status (Swedish born v born abroad) and latest recorded highest level of education, family income level, and civil status. <sup>c</sup>Includes all groups with a small number of deaths ( $\leq 10$ ) in the OCD cohort for at least one of the sexes and the causes of death classified in the ICD as 'codes for special purposes'.

**Supplementary Table E.** Hazard ratios (HRs) with 95% confidence intervals (CIs) for all cause and cause specific mortality among people with obsessive-compulsive disorder (OCD) diagnosed using ICD-10 codes, compared with matched unaffected people

|                                                                                         | Individuals<br>with OCD<br>(N=57,703) | Matched<br>unexposed<br>individuals<br>(N=576,799) | HR (95% CI)<br>Model 1 <sup>a</sup> | HR (95% CI)<br>Model 2 <sup>b</sup> |
|-----------------------------------------------------------------------------------------|---------------------------------------|----------------------------------------------------|-------------------------------------|-------------------------------------|
| <b>Causes of death</b>                                                                  | <b>n (%)</b>                          | <b>n (%)</b>                                       |                                     |                                     |
| <b>All-cause mortality</b>                                                              | 2,699 (4.68)                          | 14,546 (2.52)                                      | 2.12 (2.03 to 2.22)                 | 1.83 (1.75 to 1.91)                 |
| <b>Natural causes of death</b>                                                          | 1,947 (3.37)                          | 13,054 (2.26)                                      | 1.64 (1.56 to 1.73)                 | 1.47 (1.40 to 1.55)                 |
| Certain infectious and parasitic diseases                                               | 41 (0.07)                             | 265 (0.05)                                         | 1.54 (1.10 to 2.14)                 | 1.29 (0.92 to 1.82)                 |
| Neoplasms                                                                               | 423 (0.73)                            | 4,376 (0.76)                                       | 0.95 (0.86 to 1.05)                 | 0.92 (0.83 to 1.02)                 |
| Endocrine, nutritional and metabolic diseases                                           | 83 (0.14)                             | 405 (0.07)                                         | 2.03 (1.60 to 2.57)                 | 1.64 (1.28 to 2.10)                 |
| Mental and behavioural disorders                                                        | 138 (0.24)                            | 685 (0.12)                                         | 2.02 (1.68 to 2.43)                 | 1.79 (1.49 to 2.16)                 |
| Diseases of the nervous system                                                          | 102 (0.18)                            | 650 (0.11)                                         | 1.56 (1.26 to 1.92)                 | 1.38 (1.11 to 1.71)                 |
| Diseases of the circulatory system                                                      | 706 (1.22)                            | 4,383 (0.76)                                       | 1.63 (1.50 to 1.77)                 | 1.50 (1.38 to 1.63)                 |
| Diseases of the respiratory system                                                      | 184 (0.32)                            | 872 (0.15)                                         | 2.09 (1.78 to 2.45)                 | 1.76 (1.49 to 2.07)                 |
| Diseases of the digestive system                                                        | 103 (0.18)                            | 532 (0.09)                                         | 1.93 (1.56 to 2.39)                 | 1.49 (1.20 to 1.86)                 |
| Diseases of the genitourinary system                                                    | 33 (0.06)                             | 139 (0.02)                                         | 2.32 (1.59 to 3.40)                 | 2.11 (1.42 to 3.13)                 |
| Congenital malformations, deformations, and chromosomal abnormalities                   | 15 (0.03)                             | 72 (0.01)                                          | 2.06 (1.18 to 3.59)                 | 0.78 (0.34 to 1.78)                 |
| Symptoms, signs and abnormal clinical and laboratory findings, not elsewhere classified | 84 (0.15)                             | 416 (0.07)                                         | 2.01 (1.59 to 2.55)                 | 1.58 (1.23 to 2.02)                 |
| Other natural causes of death <sup>c</sup>                                              | 21 (0.04)                             | 142 (0.02)                                         | 1.33 (0.93 to 1.89)                 | 1.22 (0.85 to 1.75)                 |
| <b>Unnatural causes of death</b>                                                        |                                       |                                                    |                                     |                                     |
| External causes of morbidity and mortality                                              | 752 (1.30)                            | 1,492 (0.26)                                       | 5.03 (4.61 to 5.49)                 | 3.27 (2.97 to 3.61)                 |
| Accidents                                                                               | 234 (0.41)                            | 700 (0.12)                                         | 3.28 (2.83 to 3.81)                 | 2.17 (1.85 to 2.56)                 |
| Suicides                                                                                | 509 (0.88)                            | 719 (0.12)                                         | 7.07 (6.31 to 7.92)                 | 4.75 (4.18 to 5.38)                 |

<sup>a</sup>Adjusted for all matching variables (i.e., sex, birth year, county of residence at the time of OCD diagnosis). <sup>b</sup>Adjusted for all variables in Model 1 and additionally for migrant status (Swedish born v born abroad) and latest recorded highest level of education, family income level, and civil status. <sup>c</sup>Includes all groups with a small number of deaths ( $\leq 10$ ) in the OCD cohort and the causes of death classified in the ICD as ‘codes for special purposes’.

**Supplementary Table F.** Hazard ratios (HRs) with 95% confidence intervals (CIs) for all cause and cause specific mortality among people with obsessive-compulsive disorder (OCD), compared with matched unaffected people, excluding people with missing data in the selected covariates

|                                                                                         | Individuals<br>with OCD<br>(N=57,659) | Matched<br>unexposed<br>individuals<br>(N=575,645) | HR (95% CI)<br>Model 1 <sup>a</sup> | HR (95% CI)<br>Model 2 <sup>b</sup> |
|-----------------------------------------------------------------------------------------|---------------------------------------|----------------------------------------------------|-------------------------------------|-------------------------------------|
| <b>Causes of death</b>                                                                  | <b>n (%)</b>                          | <b>n (%)</b>                                       |                                     |                                     |
| <b>All-cause mortality</b>                                                              | 4,287 (7.44)                          | 27,622 (4.80)                                      | 2.02 (1.95 to 2.09)                 | 1.82 (1.76 to 1.89)                 |
| <b>Natural causes of death</b>                                                          | 3,365 (5.84)                          | 25,529 (4.43)                                      | 1.62 (1.56 to 1.69)                 | 1.50 (1.44 to 1.56)                 |
| Certain infectious and parasitic diseases                                               | 65 (0.11)                             | 472 (0.08)                                         | 1.42 (1.10 to 1.85)                 | 1.24 (0.95 to 1.63)                 |
| Neoplasms                                                                               | 708 (1.23)                            | 7,718 (1.34)                                       | 0.93 (0.86 to 1.01)                 | 0.95 (0.87 to 1.02)                 |
| Diseases of the blood and blood-forming organs and certain disorders                    | 11 (0.02)                             | 96 (0.02)                                          | 1.18 (0.63 to 2.21)                 | 0.98 (0.51 to 1.86)                 |
| Endocrine, nutritional and metabolic diseases                                           | 133 (0.23)                            | 699 (0.12)                                         | 1.97 (1.64 to 2.38)                 | 1.62 (1.33 to 1.96)                 |
| Mental and behavioural disorders                                                        | 235 (0.41)                            | 1,429 (0.25)                                       | 1.74 (1.51 to 2.00)                 | 1.58 (1.37 to 1.82)                 |
| Diseases of the nervous system                                                          | 140 (0.24)                            | 1,091 (0.19)                                       | 1.31 (1.09 to 1.56)                 | 1.19 (0.99 to 1.43)                 |
| Diseases of the circulatory system                                                      | 1,359 (2.36)                          | 9,817 (1.71)                                       | 1.54 (1.45 to 1.64)                 | 1.44 (1.35 to 1.53)                 |
| Diseases of the respiratory system                                                      | 330 (0.57)                            | 1,747 (0.30)                                       | 1.96 (1.74 to 2.21)                 | 1.72 (1.52 to 1.94)                 |
| Diseases of the digestive system                                                        | 147 (0.25)                            | 964 (0.17)                                         | 1.60 (1.35 to 1.91)                 | 1.31 (1.10 to 1.58)                 |
| Diseases of the musculoskeletal system and connective tissue                            | 16 (0.03)                             | 137 (0.02)                                         | 1.19 (0.71 to 2.00)                 | 1.16 (0.68 to 1.99)                 |
| Diseases of the genitourinary system                                                    | 56 (0.10)                             | 322 (0.06)                                         | 1.77 (1.33 to 2.35)                 | 1.60 (1.19 to 2.15)                 |
| Congenital malformations, deformations, and chromosomal abnormalities                   | 16 (0.03)                             | 90 (0.02)                                          | 1.79 (1.05 to 3.05)                 | 0.65 (0.31 to 1.34)                 |
| Symptoms, signs and abnormal clinical and laboratory findings, not elsewhere classified | 119 (0.21)                            | 730 (0.13)                                         | 1.70 (1.40 to 2.07)                 | 1.40 (1.15 to 1.72)                 |
| Other natural causes of death <sup>c</sup>                                              | 30 (0.05)                             | 217 (0.04)                                         | 1.39 (0.95 to 2.04)                 | 1.25 (0.84 to 1.84)                 |
| <b>Unnatural causes of death</b>                                                        |                                       |                                                    |                                     |                                     |
| External causes of morbidity and mortality                                              | 921 (1.60)                            | 2,079 (0.36)                                       | 4.53 (4.19 to 4.90)                 | 3.21 (2.95 to 3.49)                 |
| Accidents                                                                               | 295 (0.51)                            | 1,075 (0.19)                                       | 2.77 (2.43 to 3.16)                 | 2.00 (1.74 to 2.30)                 |
| Suicides                                                                                | 607 (1.05)                            | 897 (0.16)                                         | 6.88 (6.20 to 7.63)                 | 4.77 (4.26 to 5.34)                 |
| Other unnatural causes of death                                                         | 19 (0.03)                             | 107 (0.02)                                         | 1.74 (1.06 to 2.83)                 | 1.39 (0.83 to 2.35)                 |

<sup>a</sup>Adjusted for all matching variables (i.e., sex, birth year, county of residence at the time of OCD diagnosis). <sup>b</sup>Adjusted for all variables in Model 1 and additionally for migrant status (Swedish born v born abroad) and latest recorded highest level of education, family income level, and civil status. <sup>c</sup>Includes all groups with a small number of deaths ( $\leq 10$ ) in the OCD cohort and the causes of death classified in the ICD as ‘codes for special purposes’.
